# Supplementary material
Source: Royal Society of Chemistry journal article supplement (doi:10.1039/d6dt00571c)
Supplement: d6dt00571c1.pdf [file d6dt00571c1.pdf]

**Synthesis of Rare-Earth Metal Complexes Based on  
Quinolinyl-Functionalized Cyclopenta[*b*]Indoles and Their  
Catalytic Performance in the Polymerization of  
*Ortho*-Methoxystyrene and Its Derivates**

Wentao Chen,<sup>a</sup> Feng-Yi Qiu,<sup>a</sup> Keyue Guo,<sup>a</sup> Yanhong Zhou,<sup>a</sup> Haoran Tian,<sup>a</sup> Hongfan Hu\*<sup>b</sup> and Xiaochao Shi\*<sup>a</sup>

<sup>a</sup>*Department of polymer Materials, School of Materials Science and Engineering, Shanghai University, Materials Building, Nanchen Street 333, Shanghai 200444, China.*

<sup>b</sup>*Petrochemical Research Institute, PetroChina, Block A42, Science Base Petro China, Shahe Town, Changping District, Beijing 102206, China.*

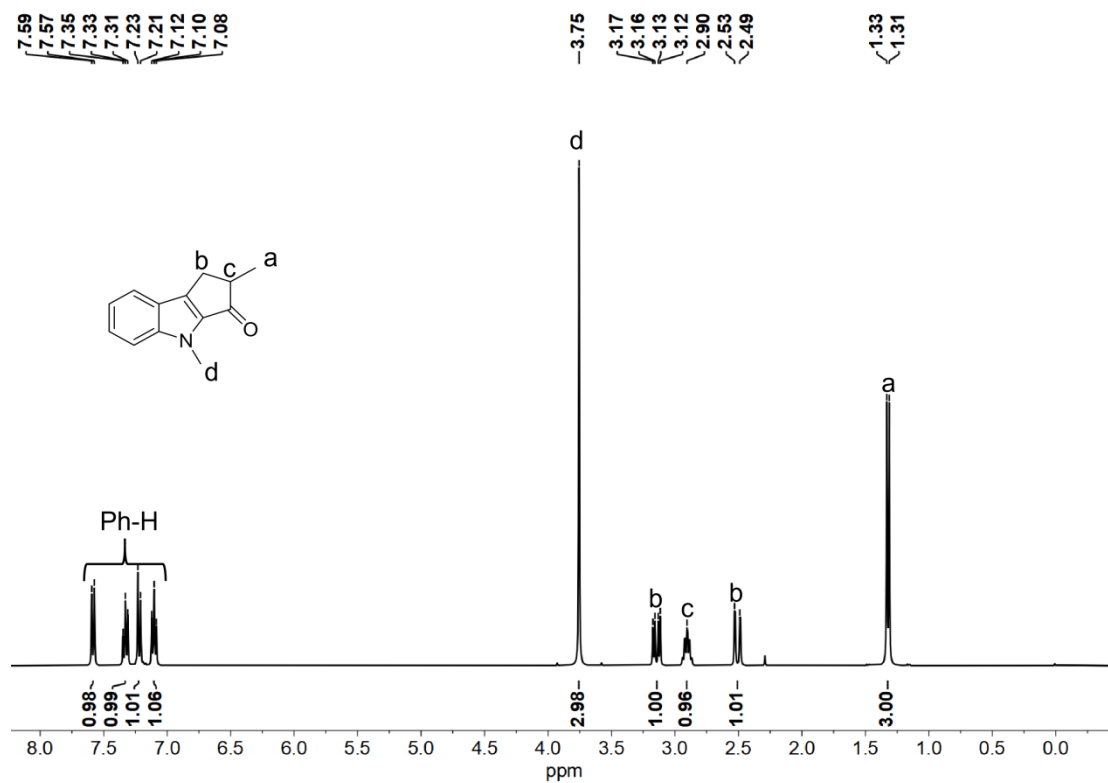

**Figure S1**  $^1\text{H}$  NMR spectrum of 2,4-dimethyl-1,4-dihydrocyclopenta[b]indol-3(2H)-one. (400 MHz,  $\text{CDCl}_3$ , 25 °C)

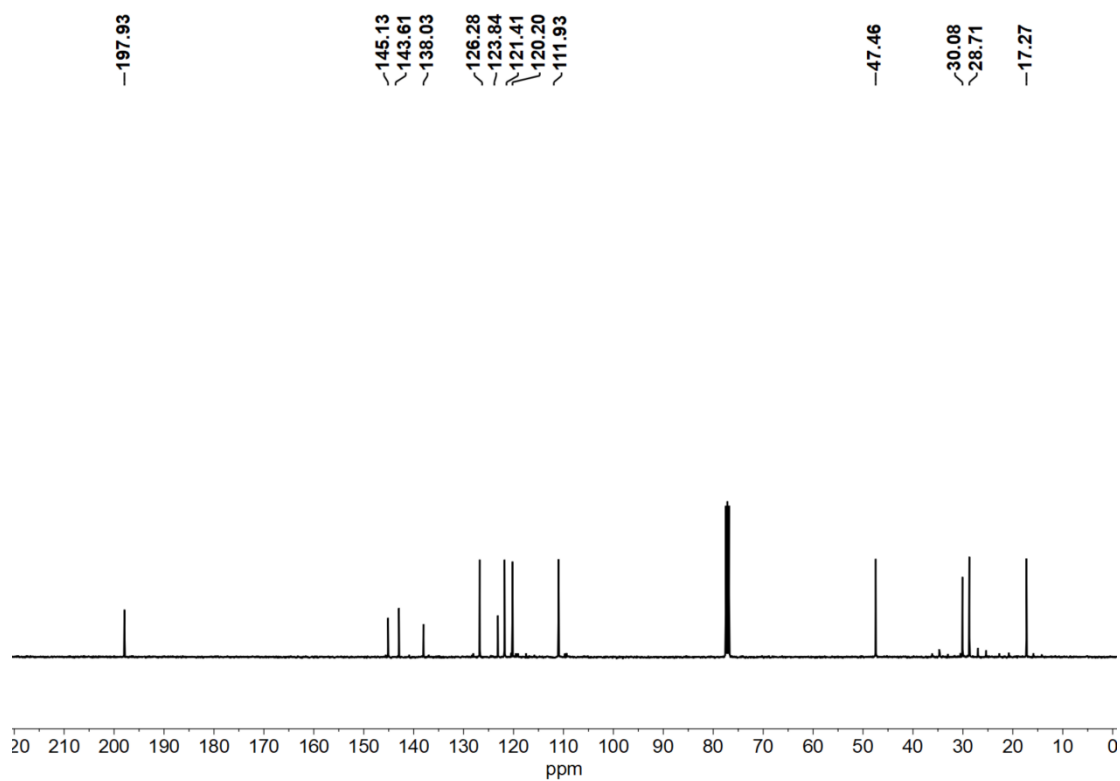

**Figure S2**  $^{13}\text{C}$  NMR spectrum of 2,4-dimethyl-1,4-dihydrocyclopenta[b]indol-3(2H)-one. (101 MHz,  $\text{CDCl}_3$ , 25 °C)

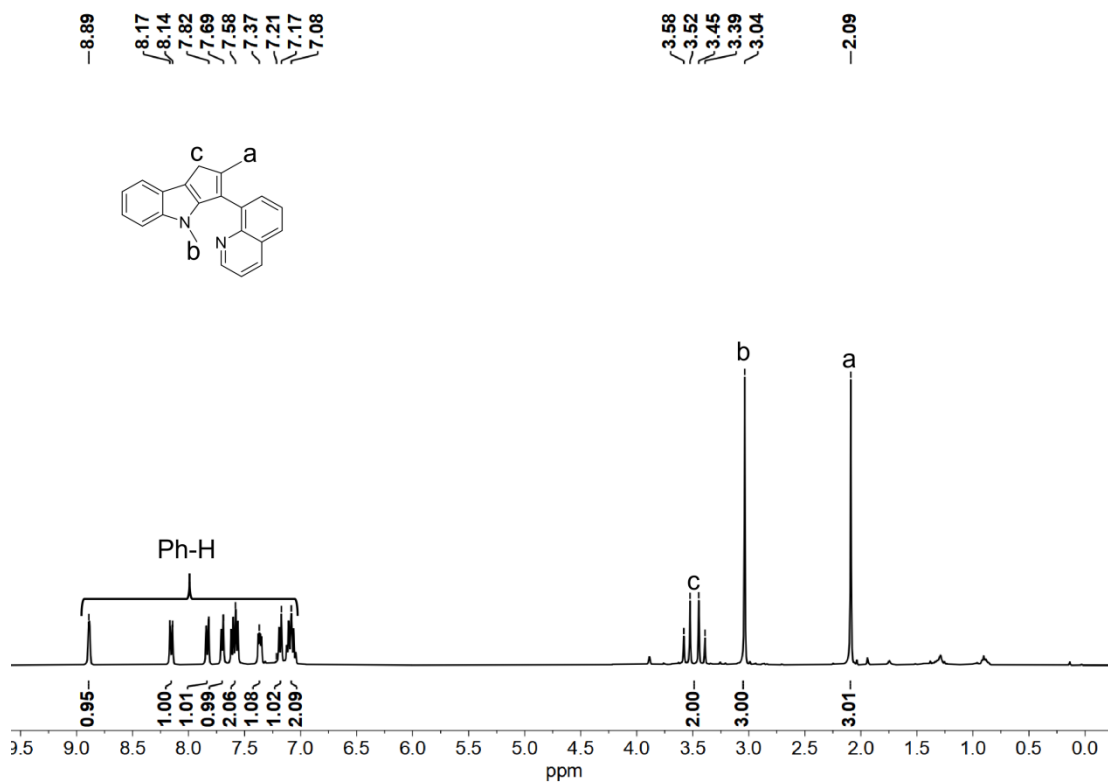

Figure S3  $^1\text{H}$  NMR spectrum of **L1H**. (400 MHz,  $\text{CDCl}_3$ , 25 °C)

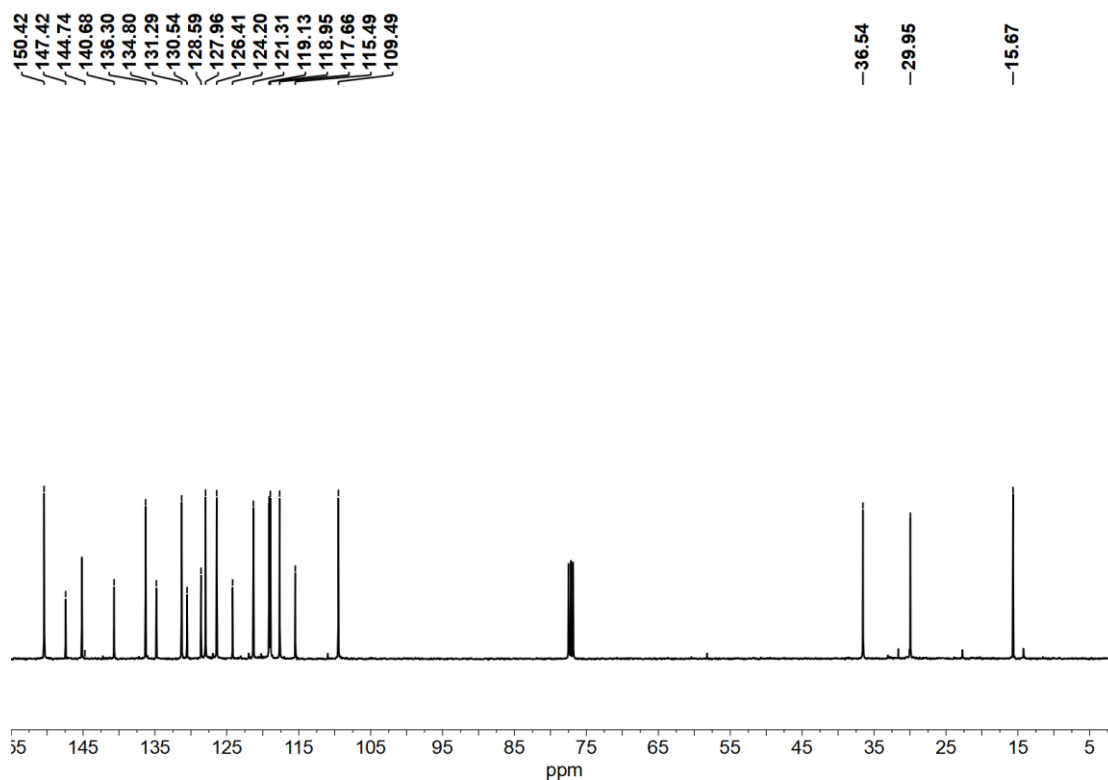

Figure S4  $^{13}\text{C}$  NMR spectrum of **L1H**. (100 MHz,  $\text{CDCl}_3$ , 25 °C)

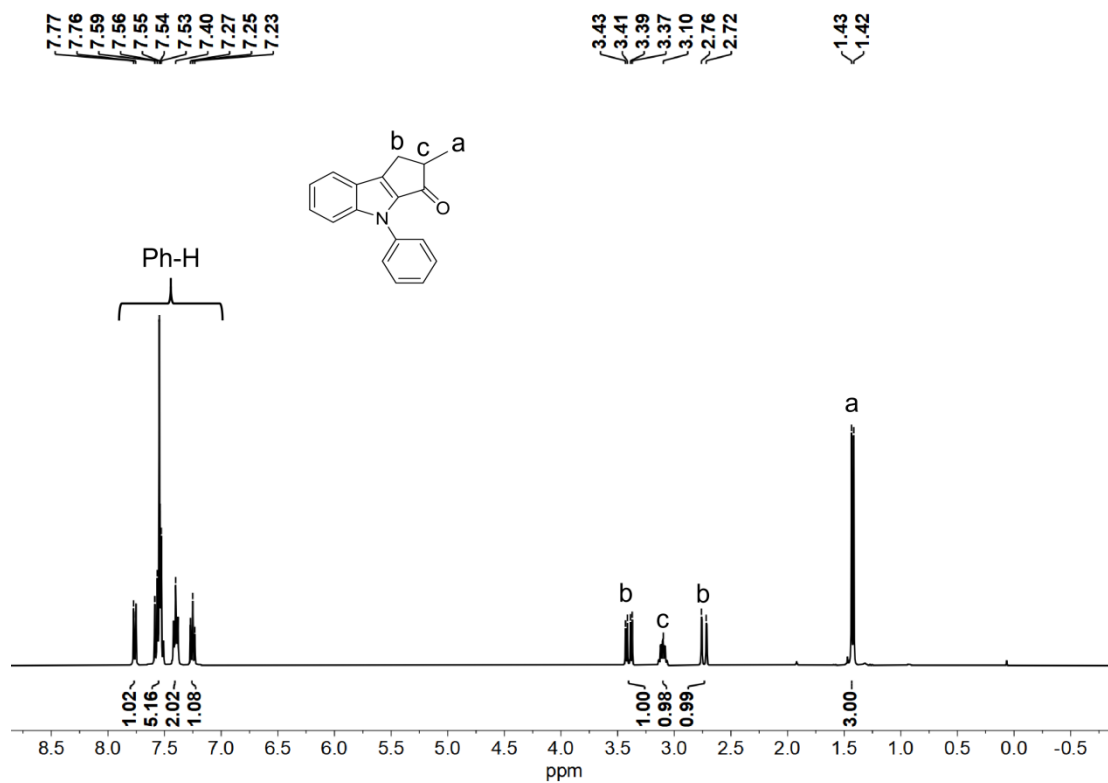

**Figure S5**  $^1\text{H}$  NMR spectrum of 2-methyl-4-phenyl-1,4-dihydrocyclopenta[b]indol-3(2H)-one. (400 MHz,  $\text{CDCl}_3$ , 25  $^\circ\text{C}$ )

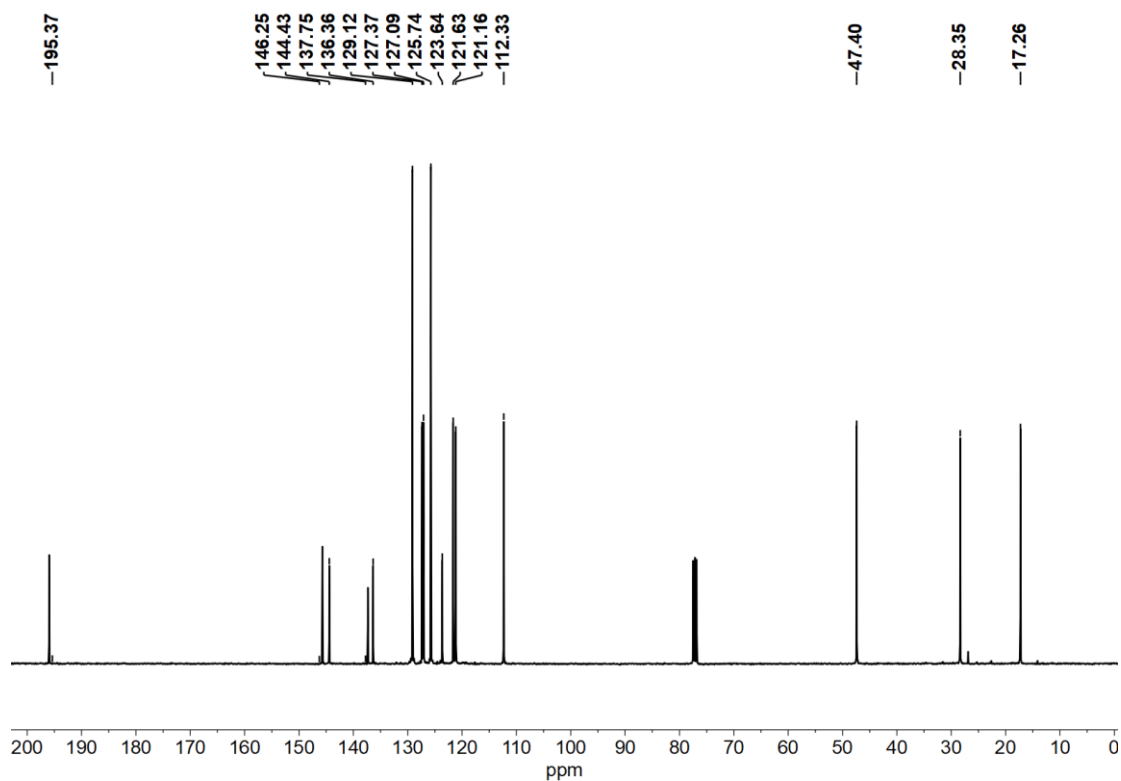

**Figure S6**  $^{13}\text{C}$  NMR spectrum of 2-methyl-4-phenyl-1,4-dihydrocyclopenta[b]indol-3(2H)-one. (101 MHz,  $\text{CDCl}_3$ , 25  $^\circ\text{C}$ )

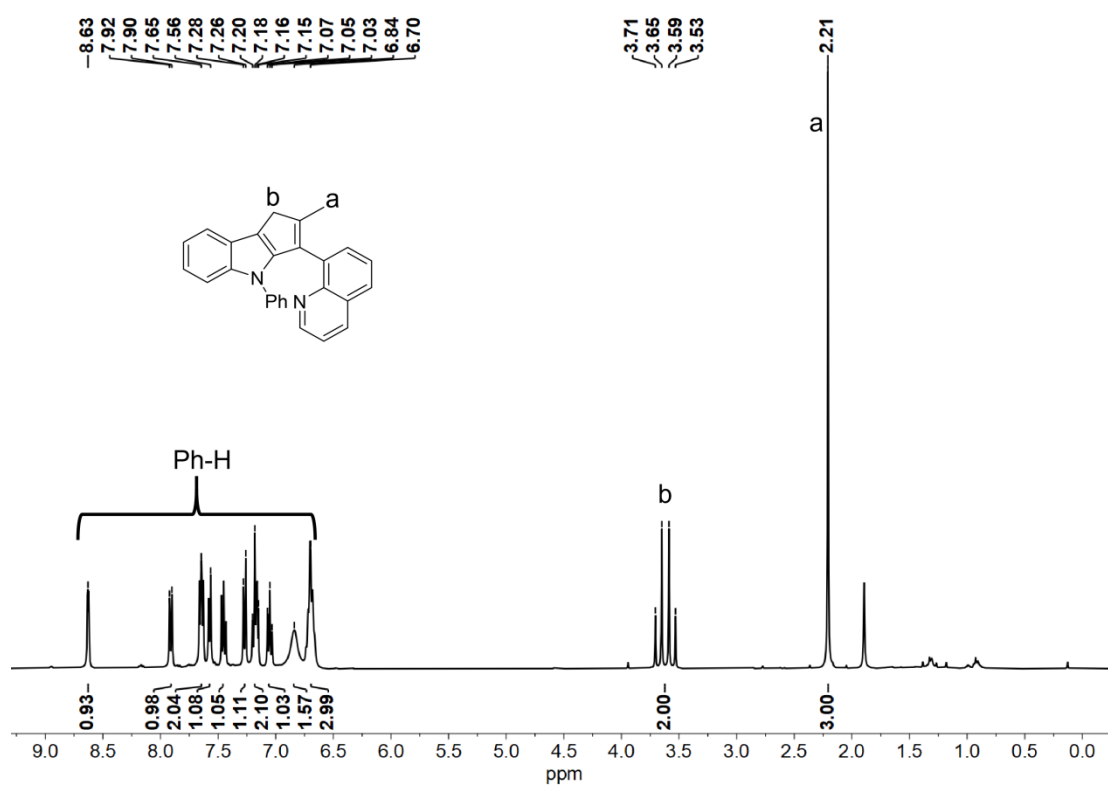

Figure S7  $^1\text{H}$  NMR spectrum of L2H. (400 MHz,  $\text{CDCl}_3$ , 25  $^\circ\text{C}$ )

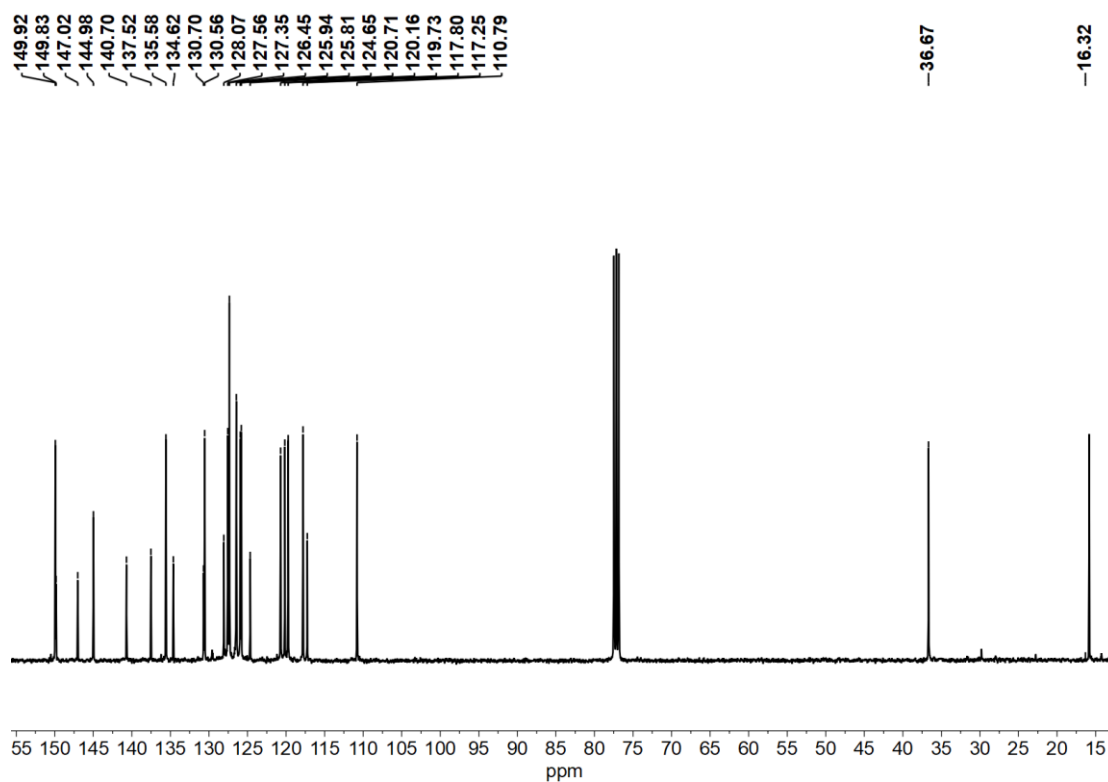

Figure S8  $^{13}\text{C}$  NMR spectrum of L2H. (100 MHz,  $\text{CDCl}_3$ , 25  $^\circ\text{C}$ )

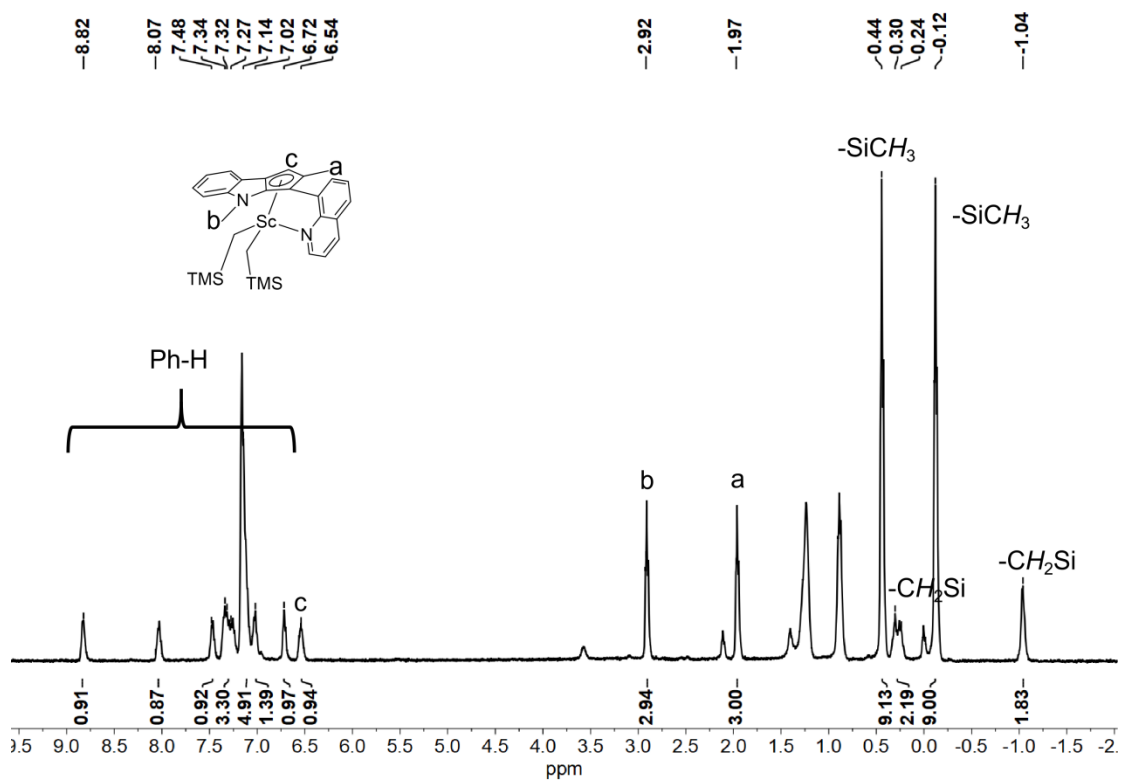

Figure S9 <sup>1</sup>H NMR spectrum of 1-Sc. (400 MHz, C<sub>6</sub>D<sub>6</sub>, 25 °C)

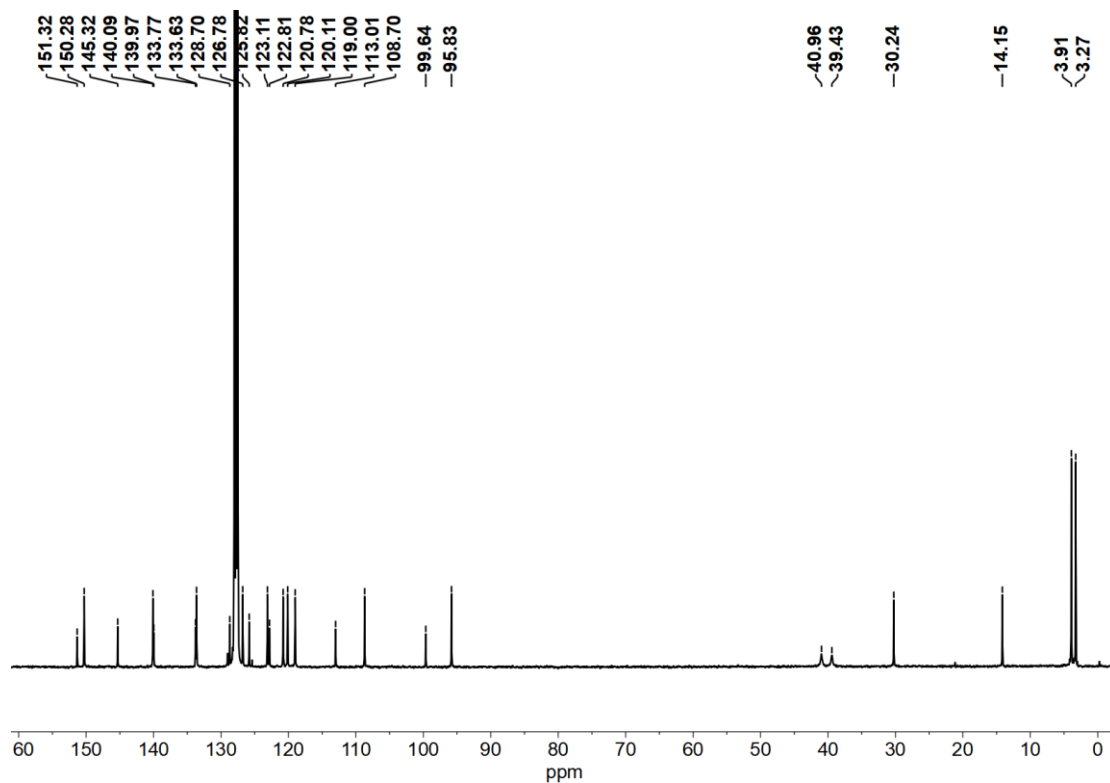

Figure S10 <sup>13</sup>C NMR spectrum of 1-Sc. (100 MHz, C<sub>6</sub>D<sub>6</sub>, 25 °C)

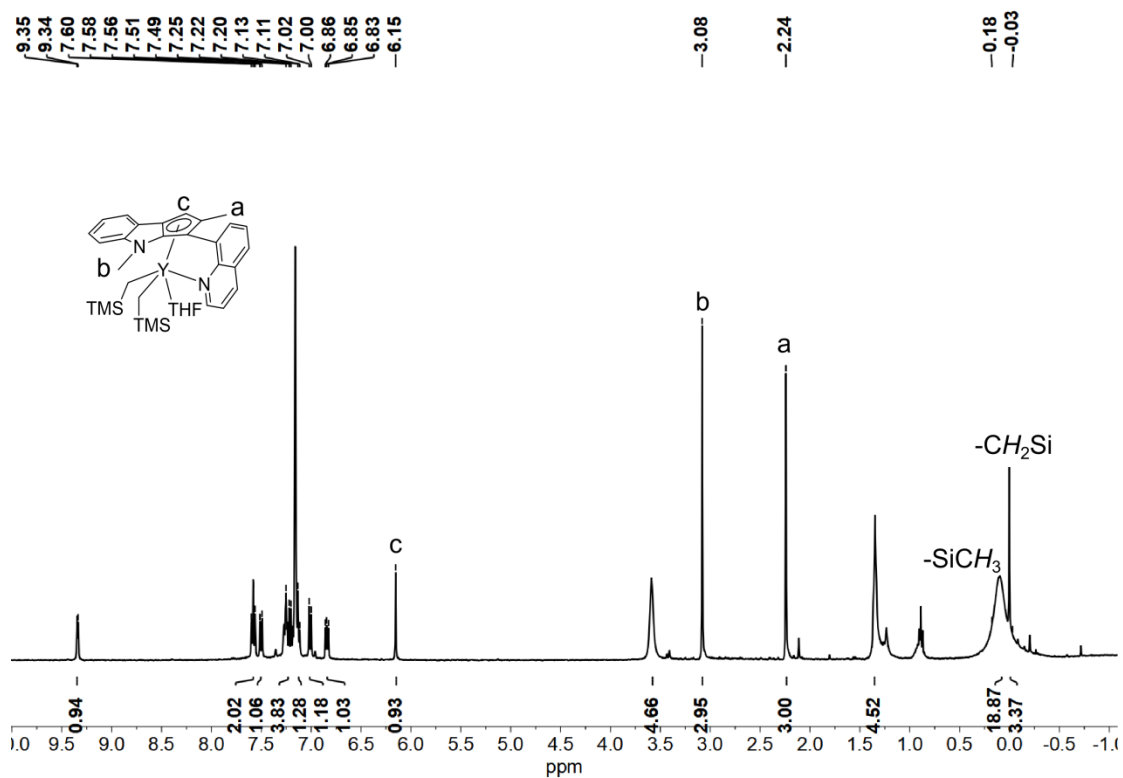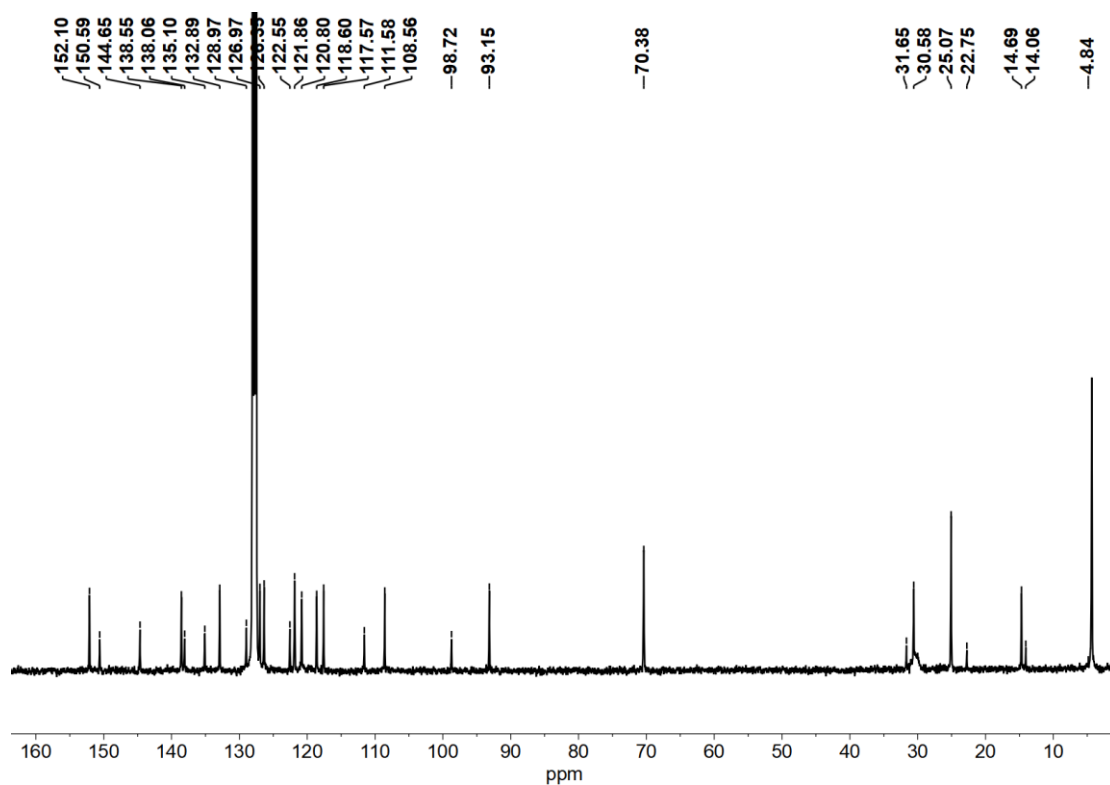

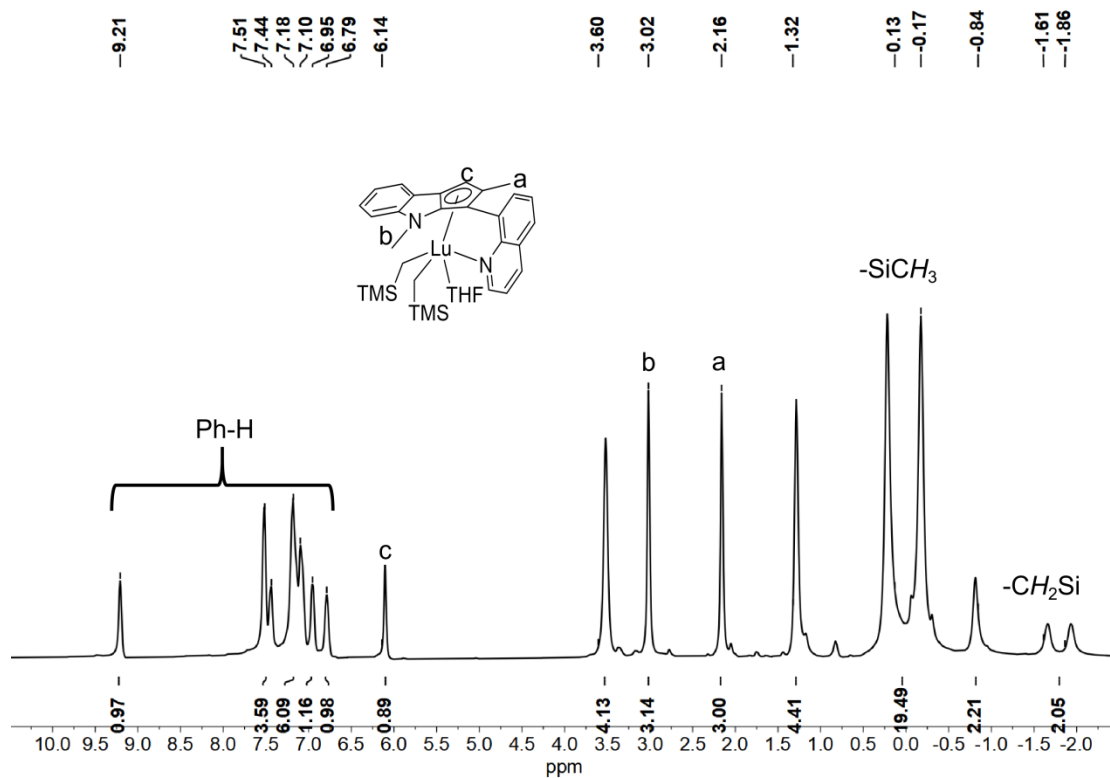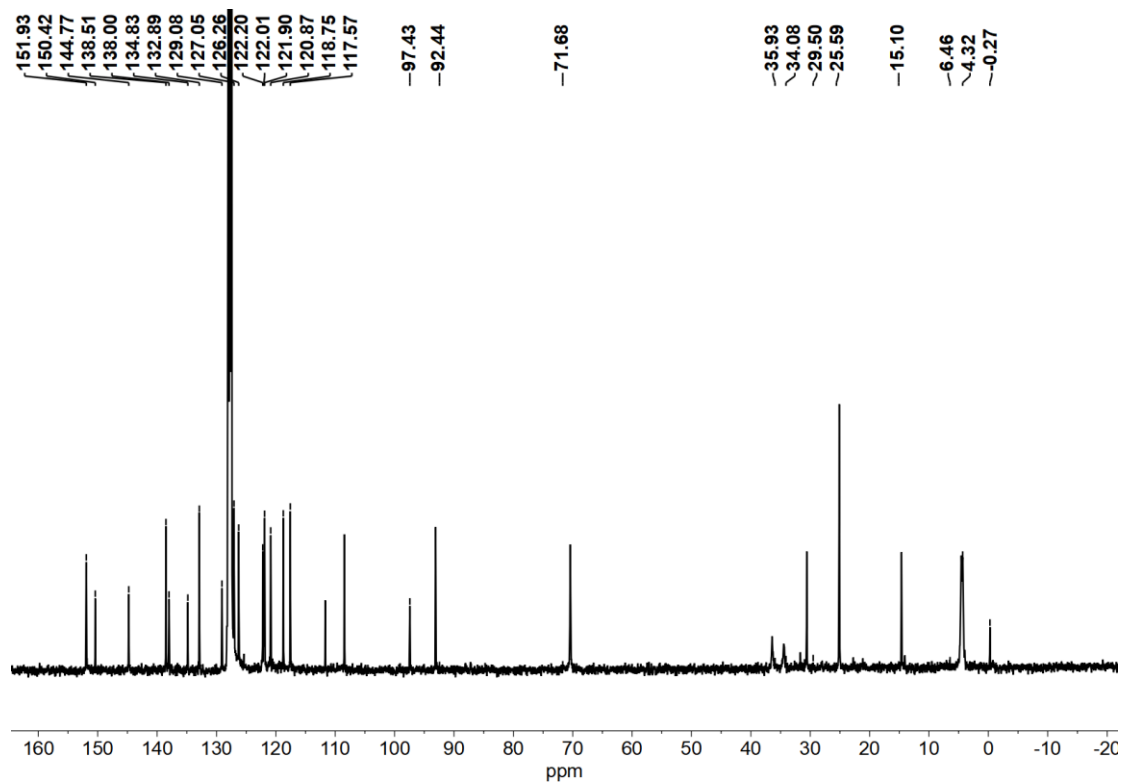

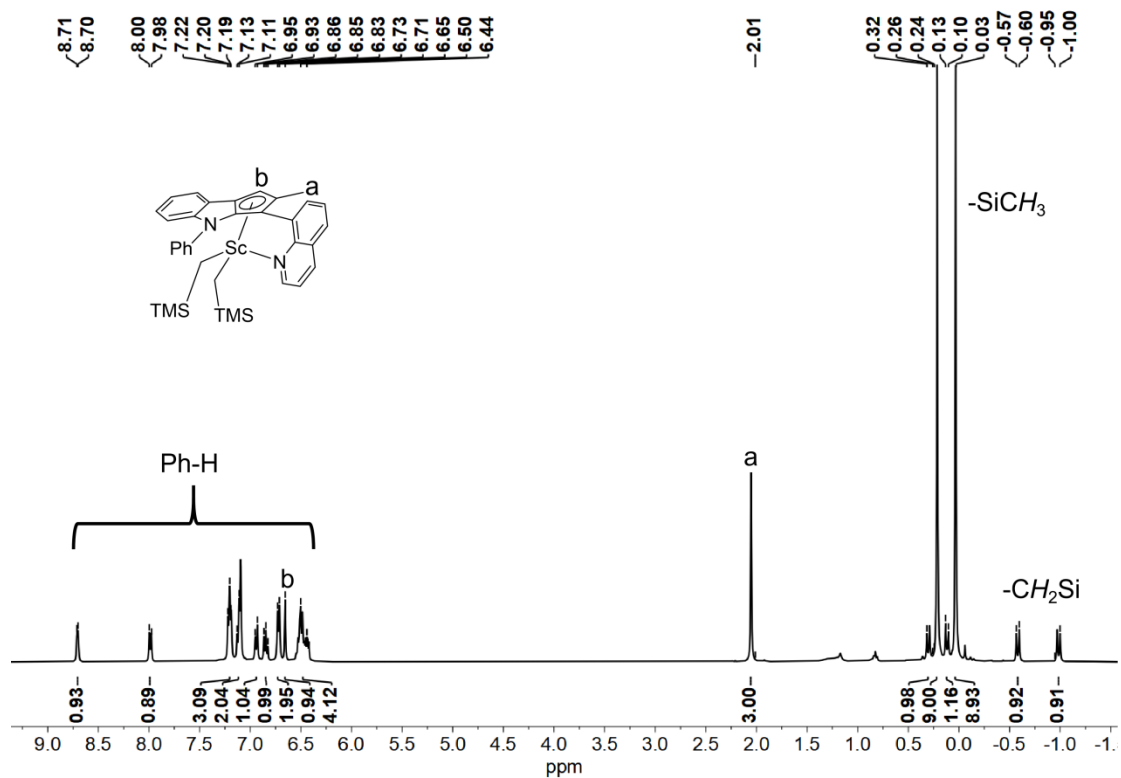

Figure S15  $^1\text{H}$  NMR spectrum of 2-Sc. (400 MHz,  $\text{C}_6\text{D}_6$ , 25  $^\circ\text{C}$ )



Figure S16  $^{13}\text{C}$  NMR spectrum of 2-Sc. (100 MHz,  $\text{C}_6\text{D}_6$ , 25  $^\circ\text{C}$ )

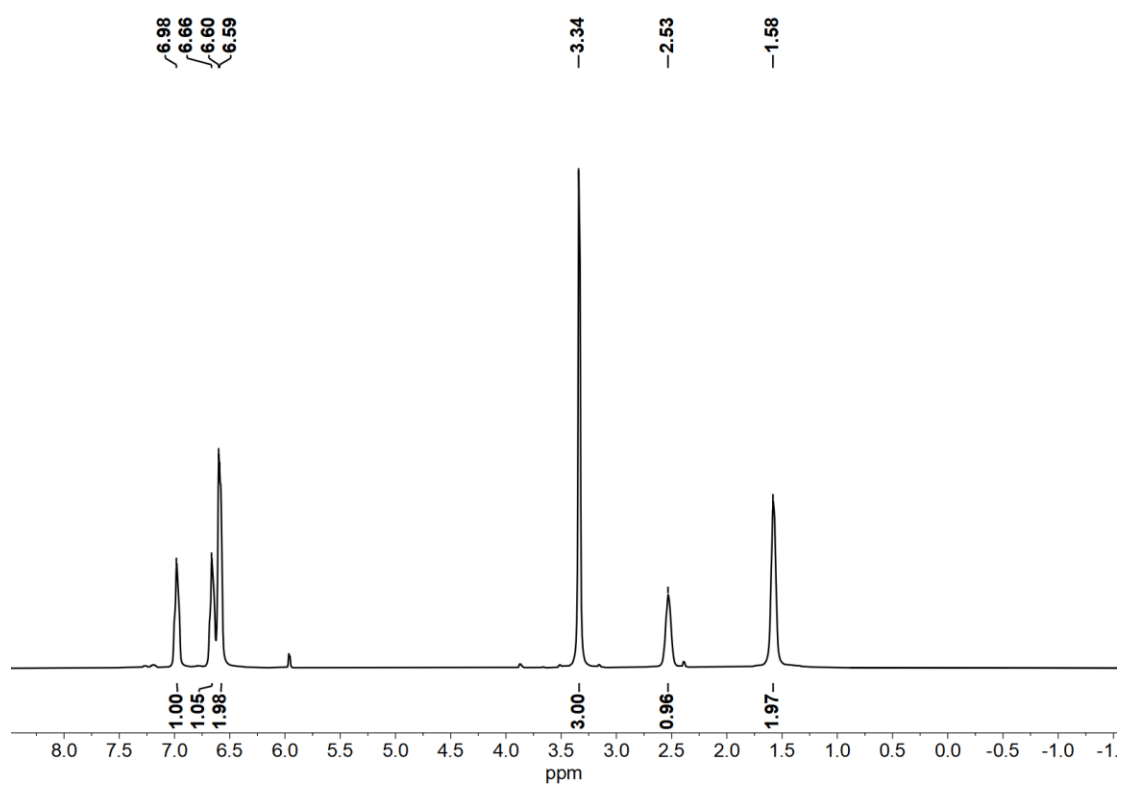

Figure S17  $^1\text{H}$  NMR spectrum of poly *o*MOS. (400 MHz,  $\text{C}_2\text{D}_2\text{Cl}_4$ , 120  $^\circ\text{C}$ )

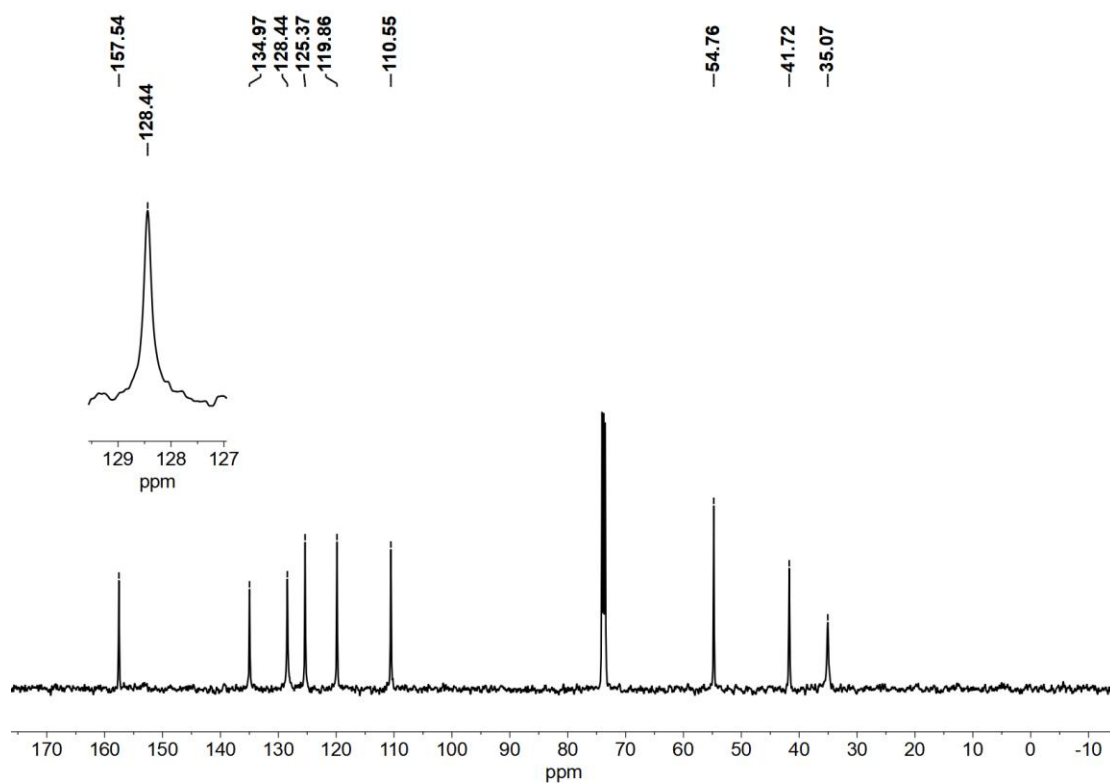

Figure S18  $^{13}\text{C}$  NMR spectrum of poly *o*MOS. (100 MHz,  $\text{C}_2\text{D}_2\text{Cl}_4$ , 120  $^\circ\text{C}$ )

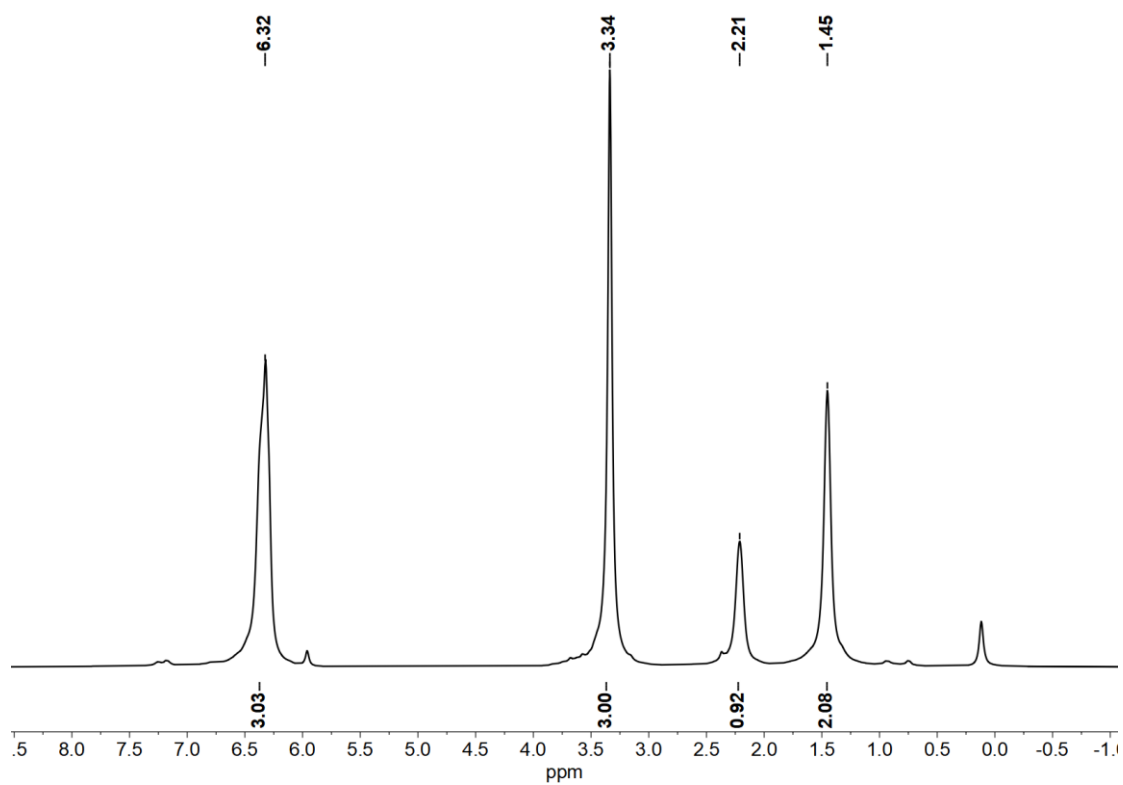

**Figure S19** <sup>1</sup>H NMR spectrum of poly(4 - FMOS). (400 MHz, C<sub>2</sub>D<sub>2</sub>Cl<sub>4</sub>, 120 °C)

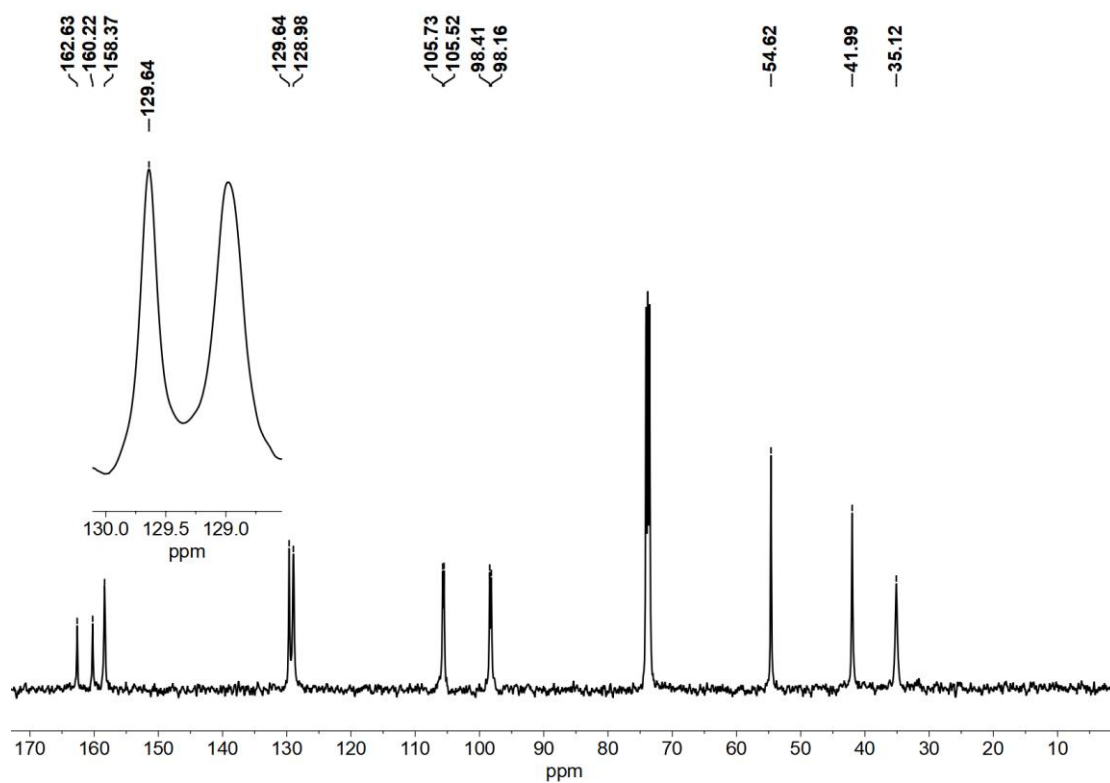

**Figure S20** <sup>13</sup>C NMR spectrum of poly(4 - FMOS). (100 MHz, C<sub>2</sub>D<sub>2</sub>Cl<sub>4</sub>, 120 °C)

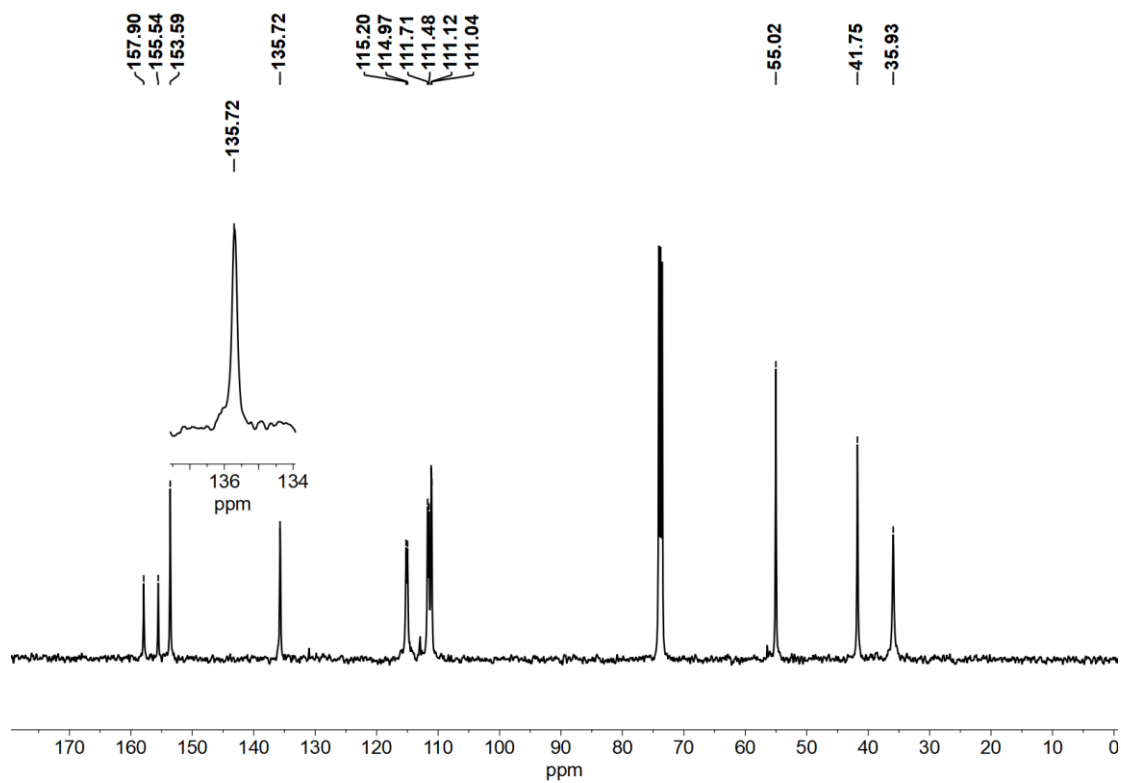

**Figure S21**  $^{13}\text{C}$  NMR spectrum of poly(5-FMOS). (100 MHz,  $\text{C}_2\text{D}_2\text{Cl}_4$ , 120  $^\circ\text{C}$ )

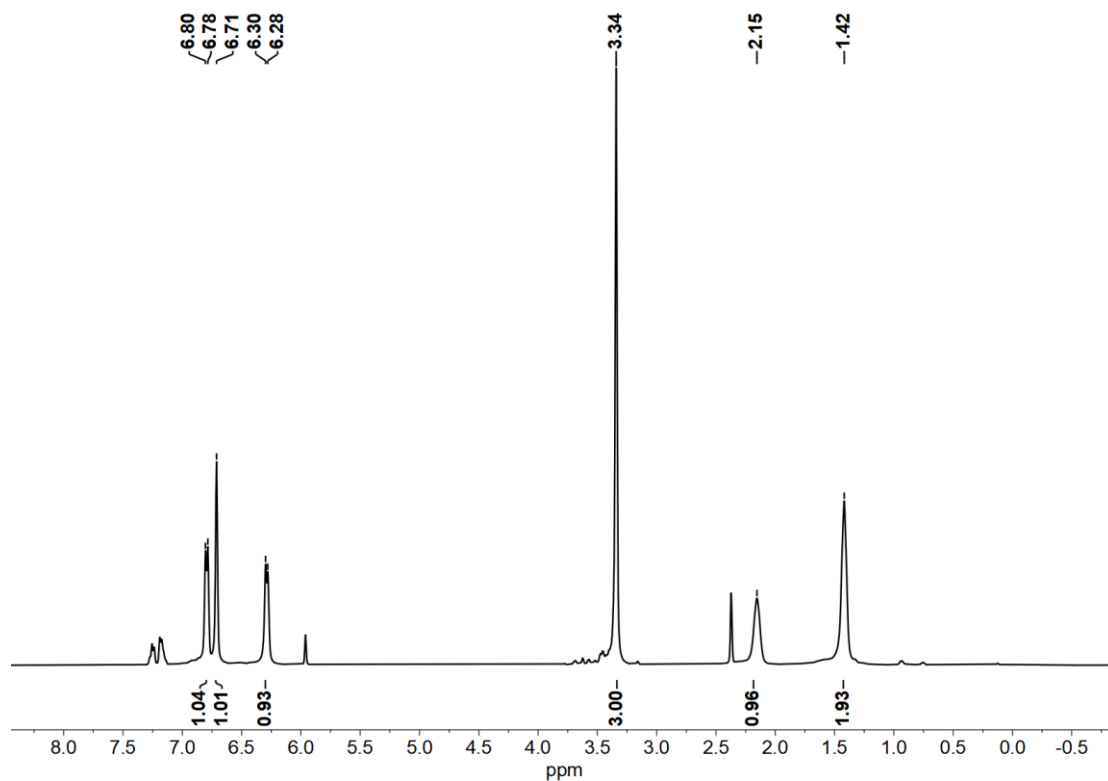

**Figure S22**  $^1\text{H}$  NMR spectrum of poly(4 - BrMOS). (400 MHz,  $\text{C}_2\text{D}_2\text{Cl}_4$ , 120  $^\circ\text{C}$ )

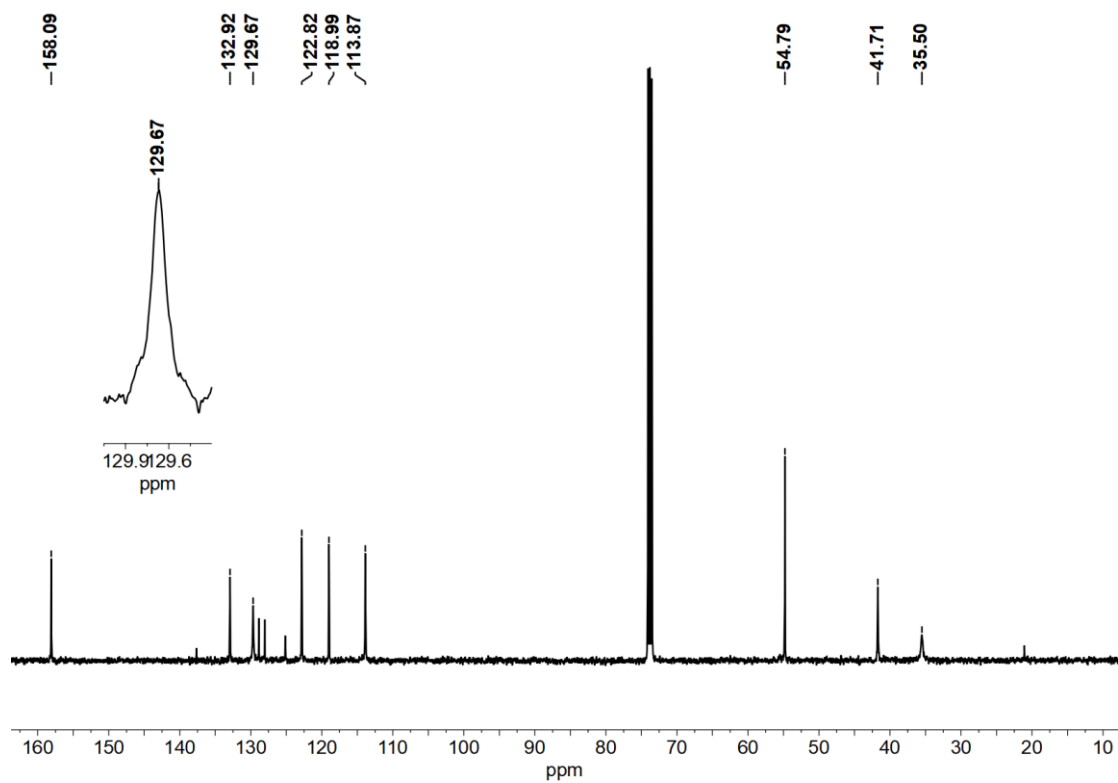

**Figure S23**  $^{13}\text{C}$  NMR spectrum of poly(4-BrMOS). (100 MHz,  $\text{C}_2\text{D}_2\text{Cl}_4$ , 120 °C)

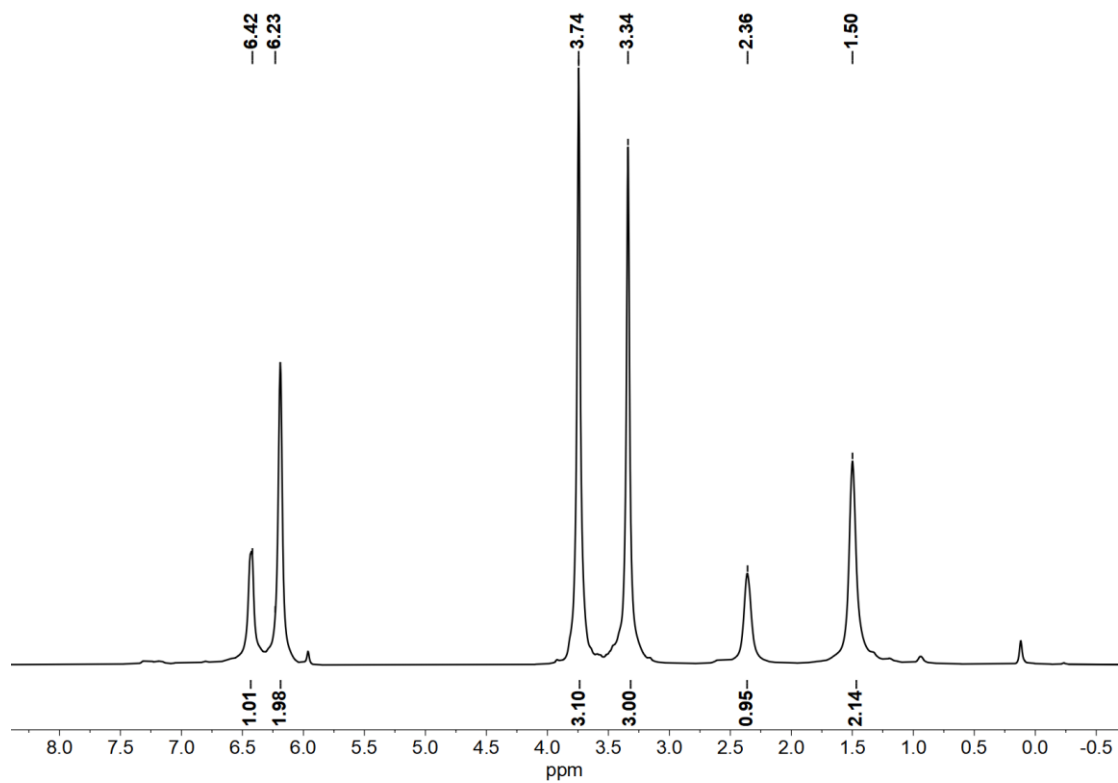

**Figure S24**  $^1\text{H}$  NMR spectrum of poly(4 - MeOMOS). (400 MHz,  $\text{C}_2\text{D}_2\text{Cl}_4$ , 120 °C)

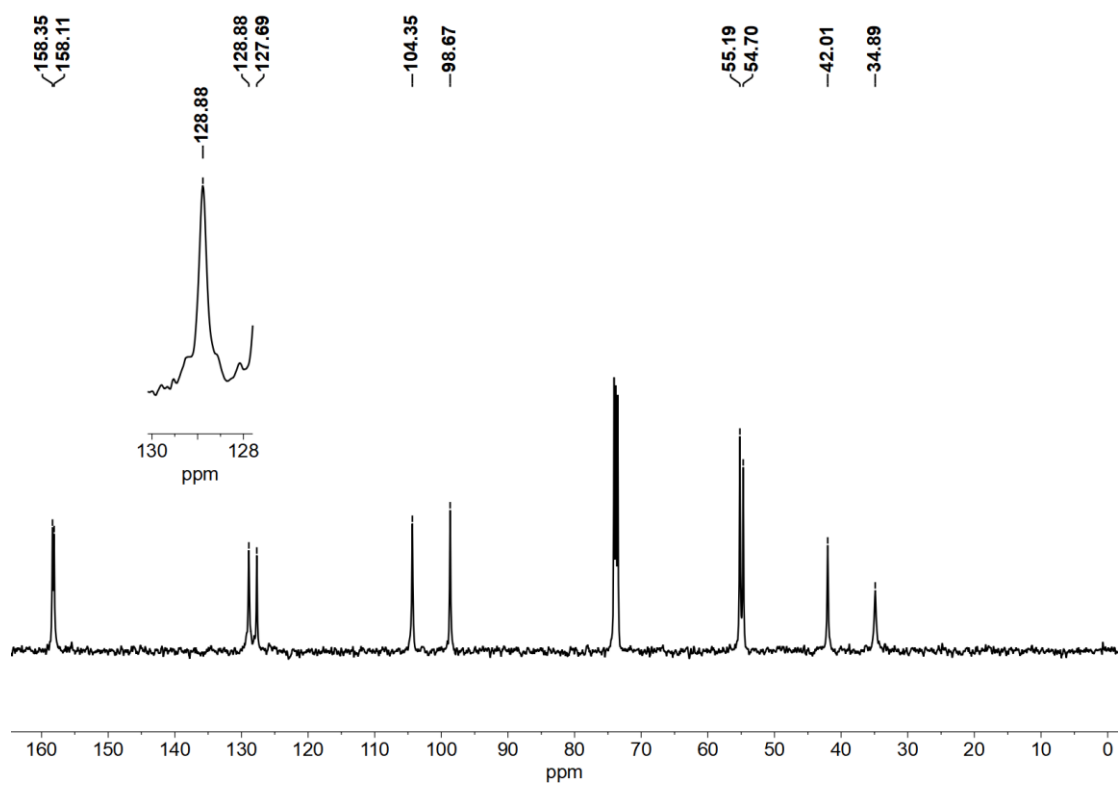

**Figure S25**  $^{13}\text{C}$  NMR spectrum of poly(4-MeOMOS). (100 MHz,  $\text{C}_2\text{D}_2\text{Cl}_4$ , 120 °C)

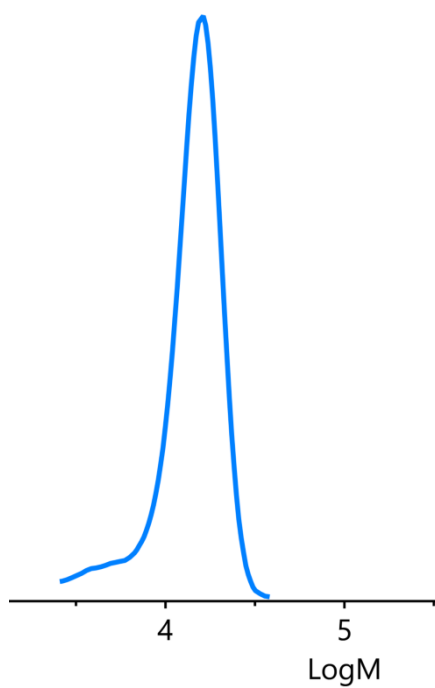

**GPC Results**

| Peak No | Mp    | Mn    | Mw    | Mz    | Mv    | PD   |
|---------|-------|-------|-------|-------|-------|------|
| 1       | 15930 | 12268 | 14871 | 16674 | 14570 | 1.21 |

**Figure S26** GPC curve of poly(oMOS) in Table 1, Entry 1.

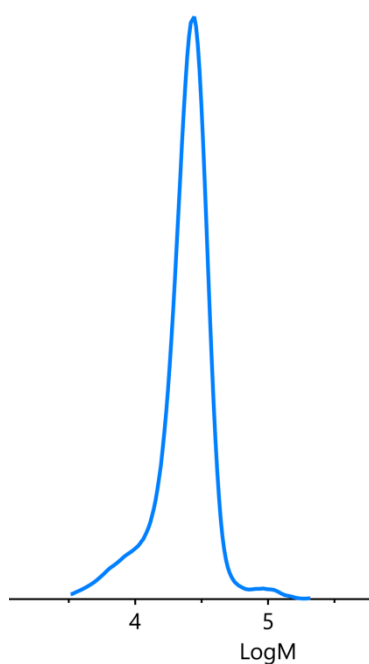

**GPC Results**

| Peak No | Mp    | Mn    | Mw    | Mz    | Mv    | PD   |
|---------|-------|-------|-------|-------|-------|------|
| 1       | 90089 | 20126 | 27685 | 40525 | 26430 | 1.38 |

**Figure S27** GPC curve of poly (*o*MOS) in Table 1, Entry 2.

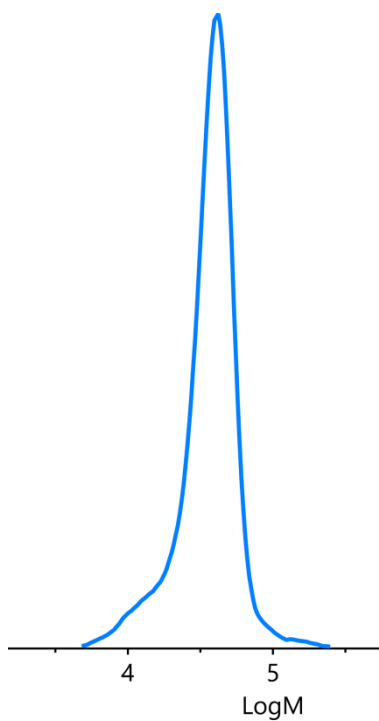

**GPC Results**

| Peak No | Mp    | Mn    | Mw    | Mz    | Mv    | PD   |
|---------|-------|-------|-------|-------|-------|------|
| 1       | 41155 | 30168 | 41300 | 57266 | 39557 | 1.37 |

**Figure S28** GPC curve of poly (*o*MOS) in Table 1, Entry 3.

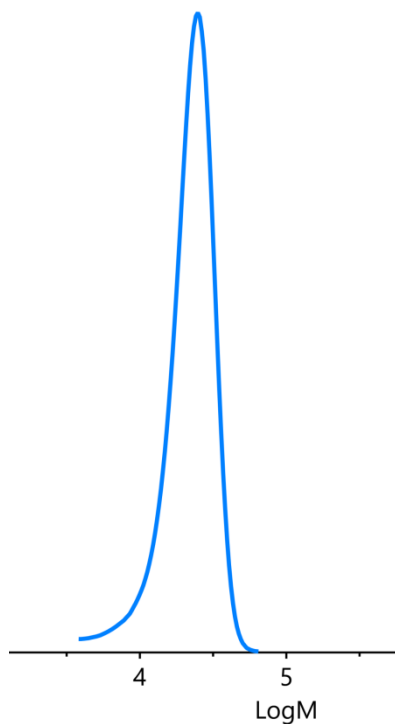

**GPC Results**

| Peak No | Mp    | Mn    | Mw    | Mz    | Mv    | PD   |
|---------|-------|-------|-------|-------|-------|------|
| 1       | 24768 | 19464 | 23149 | 25941 | 22699 | 1.19 |

**Figure S29** GPC curve of poly (*o*MOS) in Table 1, Entry 4.

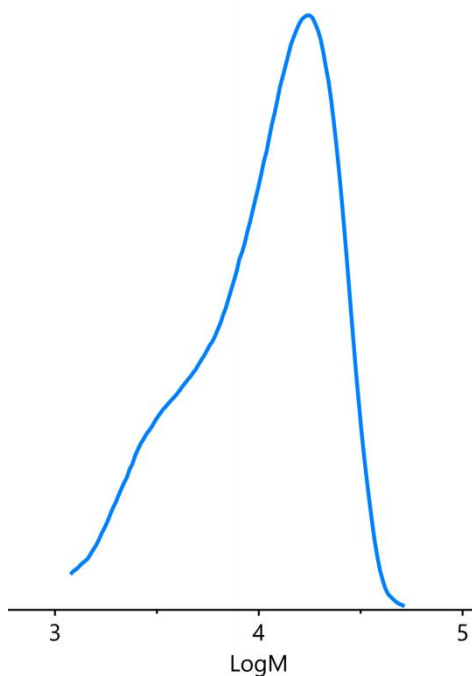

**GPC Results**

| Peak No | Mp    | Mn   | Mw    | Mz    | Mv    | PD   |
|---------|-------|------|-------|-------|-------|------|
| 1       | 17326 | 7299 | 13120 | 18383 | 12293 | 1.80 |

**Figure S30** GPC curve of poly (*o*MOS) in Table 1, Entry 5.

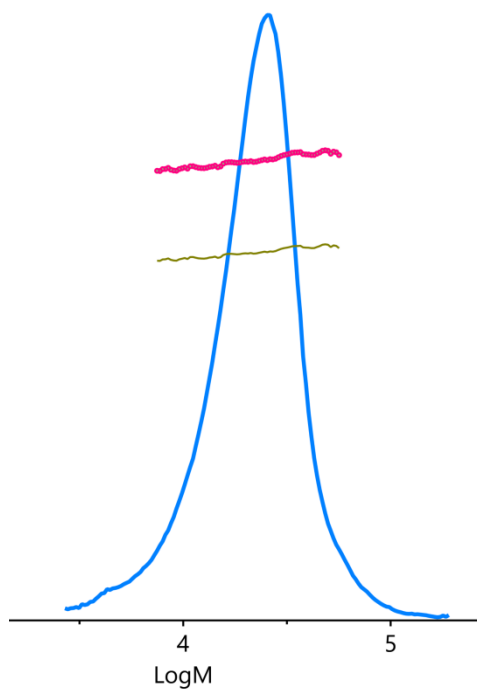

**GPC Results**

| Peak No | Mp    | Mn    | Mw    | Mz    | Mv    | PD   |
|---------|-------|-------|-------|-------|-------|------|
| 1       | 25437 | 16568 | 28055 | 49861 | 25920 | 1.69 |

**Figure S31** GPC curve of poly (*o*MOS) in Table 1, Entry 6.

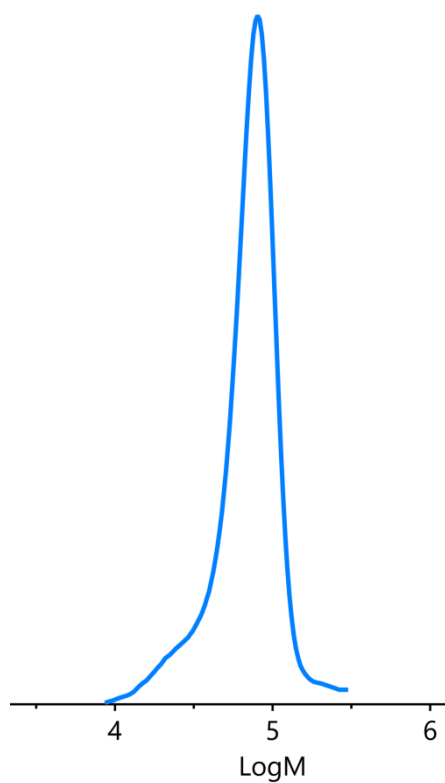

**GPC Results**

| Peak No | Mp    | Mn    | Mw    | Mz    | Mv    | PD   |
|---------|-------|-------|-------|-------|-------|------|
| 1       | 80310 | 57238 | 77030 | 96545 | 74373 | 1.35 |

**Figure S32** GPC curve of poly (*o*MOS) in Table 1, Entry 7.

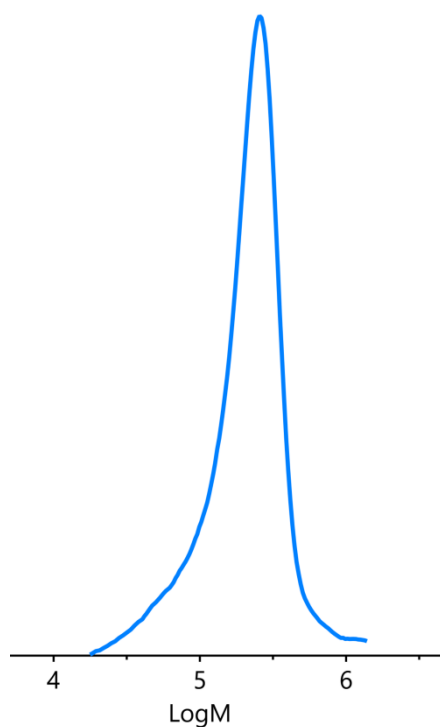

**GPC Results**

| Peak No | Mp     | Mn     | Mw     | Mz     | Mv     | PD   |
|---------|--------|--------|--------|--------|--------|------|
| 1       | 256875 | 150428 | 250116 | 379378 | 235035 | 1.66 |

**Figure S33** GPC curve of poly (*o*MOS) in Table 1, Entry 8.

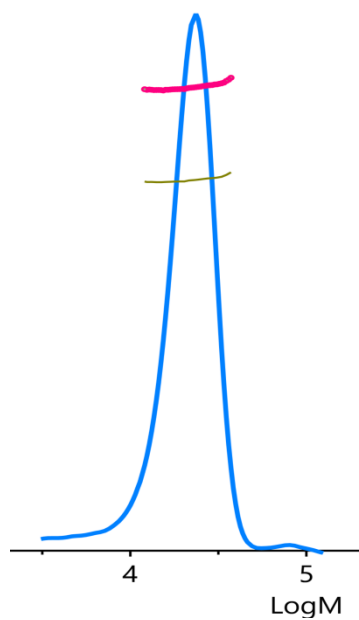

**GPC Results**

| Peak No | Mp    | Mn    | Mw    | Mz    | Mv    | PD   |
|---------|-------|-------|-------|-------|-------|------|
| 1       | 79186 | 18451 | 22243 | 25363 | 21787 | 1.21 |

**Figure S34** GPC curve of poly (*o*MOS) in Table 1, Entry 11.

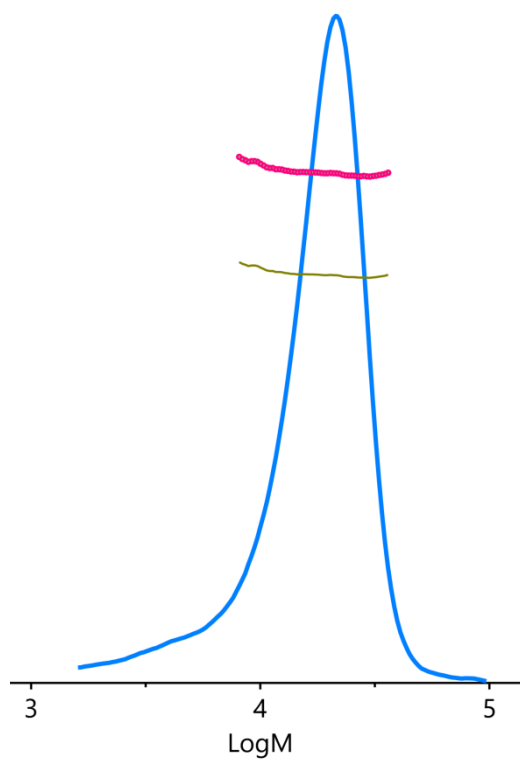

**GPC Results**

| Peak No | Mp    | Mn    | Mw    | Mz    | Mv    | PD   |
|---------|-------|-------|-------|-------|-------|------|
| 1       | 77137 | 12983 | 19424 | 24730 | 18653 | 1.50 |

**Figure S35** GPC curve of poly (oMOS) in Table 1, Entry 12.

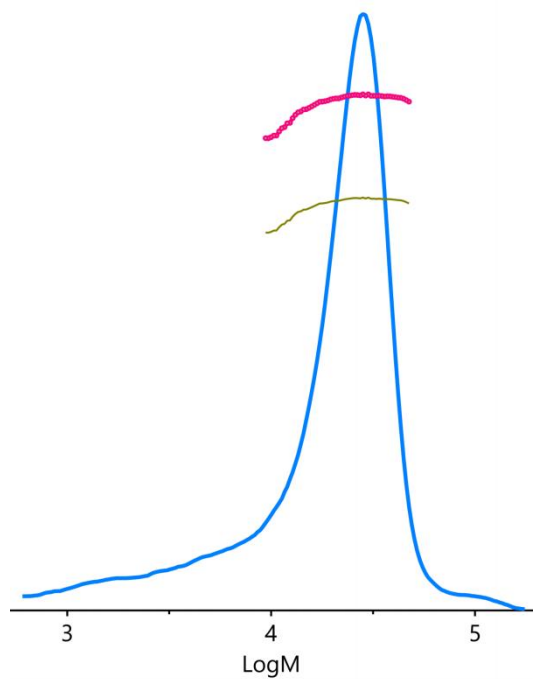

**GPC Results**

| Peak No | Mp    | Mn   | Mw    | Mz    | Mv    | PD   |
|---------|-------|------|-------|-------|-------|------|
| 1       | 28263 | 9299 | 24311 | 39390 | 22636 | 2.61 |

**Figure S36** GPC curve of poly (4-FMOS) in Table 2, Entry 3.

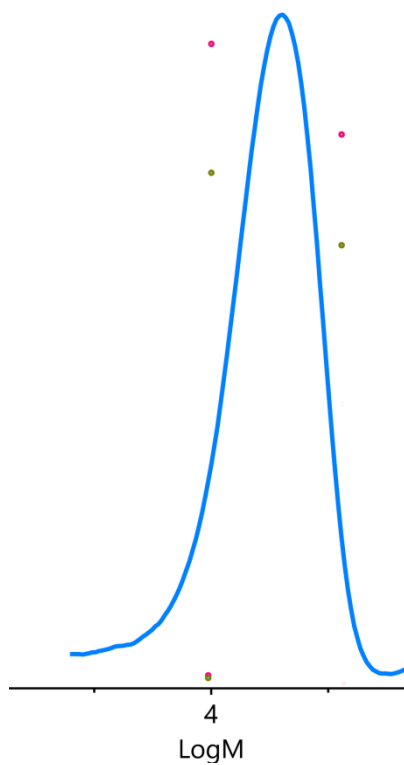

**GPC Results**

| Peak No | Mp     | Mn    | Mw    | Mz    | Mv    | PD   |
|---------|--------|-------|-------|-------|-------|------|
| 1       | 100646 | 14491 | 21107 | 34151 | 19907 | 1.46 |

**Figure S37** GPC curve of poly (5-FMOS) in Table 2, Entry 4.

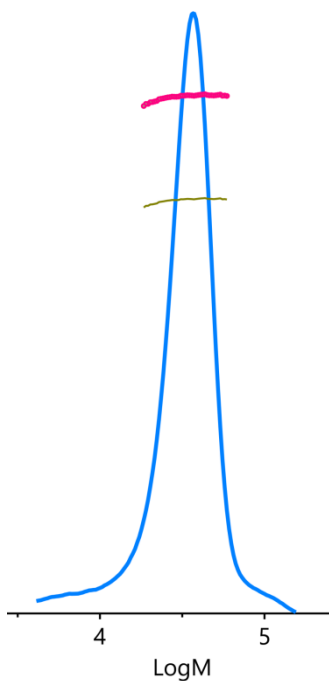

**GPC Results**

| Peak No | Mp    | Mn    | Mw    | Mz    | Mv    | PD   |
|---------|-------|-------|-------|-------|-------|------|
| 1       | 36893 | 27551 | 36046 | 43856 | 34965 | 1.31 |

**Figure S38** GPC curve of poly (4-BrMOS) in Table 2, Entry 5.

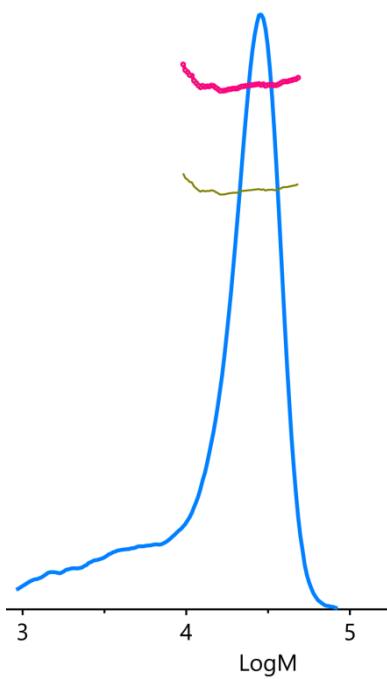

**GPC Results**

| Peak No | Mp    | Mn   | Mw    | Mz    | Mv    | PD   |
|---------|-------|------|-------|-------|-------|------|
| 1       | 28457 | 9373 | 22414 | 30014 | 21034 | 2.39 |

**Figure S39** GPC curve of poly (4-MeOMOS) in Table 2, Entry 6.
